# 1 Acclimation of phenology relieves leaf longevity constraints in deciduous forests

2

3 Laura Marqués<sup>1\*</sup>, Koen Hufkens<sup>1</sup>, Christof Bigler<sup>2</sup>, Thomas W. Crowther<sup>3</sup>, Constantin M.  
4 Zohner<sup>3</sup>, and Benjamin D. Stocker<sup>1</sup>

5 <sup>1</sup>Department of Environmental Systems Science, Institute of Agricultural Sciences, ETH  
6 Zurich, Switzerland.

7 <sup>2</sup>Department of Environmental Systems Science, Forest Ecology, Institute of Terrestrial  
8 Ecosystems, ETH Zurich, Switzerland.

9 <sup>3</sup>Department of Environmental Systems Science, Institute of Integrative Biology, ETH Zurich,  
10 Switzerland.

11 \* [laura.marques@usys.ethz.ch](mailto:laura.marques@usys.ethz.ch)

## 12 **Abstract**

13 Leaf phenology is key for regulating total growing season mass and energy fluxes. Long-term  
14 temporal trends towards earlier leaf unfolding are observed across Northern Hemisphere  
15 forests. Phenological dates also vary between years, whereby end-of-season (EOS) dates  
16 correlate positively with start-of-season (SOS) dates and negatively with growing season total  
17 net CO<sub>2</sub> assimilation ( $A_{\text{net}}$ ). These associations have been interpreted as the effect of a  
18 constrained leaf longevity or of premature carbon (C) sink saturation - with far-reaching  
19 consequences for long-term phenology projections under climate change and rising CO<sub>2</sub>. Here,  
20 we use multi-decadal ground and remote-sensing observations to show that the relationships  
21 between  $A_{\text{net}}$  and EOS are opposite at the interannual and the decadal time scales. A decadal  
22 trend towards later EOS persists in parallel with a trend towards increasing  $A_{\text{net}}$  - in spite of the  
23 negative  $A_{\text{net}}$ -EOS relationship at the interannual scale. This indicates that acclimation of  
24 phenology has enabled plants to transcend a constrained leaf longevity or premature C sink  
25 saturation over the course of several decades, leading to a more effective use of available light  
26 and a sustained extension of the vegetation CO<sub>2</sub> uptake season over time.

## 27 Main Text

28 For deciduous tree species in temperate and boreal forests, the timing of leaf unfolding in spring  
29 and leaf senescence in autumn determines the length of the season during which sunlight is  
30 intercepted by leaves, CO<sub>2</sub> is taken up, and water is transpired. SOS and EOS dates fluctuate  
31 at multiple scales, driven by numerous interacting mechanisms that will collectively determine  
32 the long-term response to climate change. Dates of leaf phenology vary across climatic<sup>1</sup> and  
33 elevational gradients<sup>2</sup>. Long-term temporal trends towards earlier leaf unfolding have been  
34 observed across the Northern Hemisphere in remote sensing data and documented in long-term  
35 tree-level observations<sup>3-5</sup>. Such phenological shifts in response to global climate change are  
36 altering carbon, water, and nutrient cycling and induce feedbacks within the Earth system<sup>6, 7</sup>.

37 Relatively reliable models exist to predict SOS based on accumulated temperature and  
38 photoperiod<sup>8-11</sup>. In contrast, long-term trends in autumn senescence are less clear<sup>3, 12-14</sup>, depend  
39 on EOS definitions based on senescence start, leaf discolouration stages, or dormancy<sup>15, 16</sup>, and  
40 drivers are not well understood<sup>6</sup>. Although experimental evidence exists demonstrating that  
41 warm autumn temperatures delay leaf senescence<sup>17</sup>, long-term observations often do not show  
42 corresponding phenology trends in spite of persistent autumn warming<sup>18, 19</sup>, but see<sup>20</sup>. This has  
43 compromised the development of accurate predictive models and undermines phenology  
44 projections under future climate conditions<sup>21-23</sup>. However, a positive correlation between  
45 annual SOS and EOS dates has been found in observational<sup>24, 25</sup> and experimental studies<sup>17, 26</sup>,  
46 potentially providing useful information for improving EOS predictions. A recent study<sup>27</sup>  
47 found an even stronger relationship between observed EOS and simulated  $A_{\text{net}}$ , such that greater  
48 productivity was associated with earlier leaf senescence. This negative relationship between  
49  $A_{\text{net}}$  and EOS was interpreted as an expression of plant C sink saturation<sup>26, 28, 29</sup>, whereby an  
50 early replenishment of non-structural carbon reserves induces an early cessation of the  
51 photosynthetically active season. An EOS advancement over the second half of the 21<sup>st</sup> century  
52 was thus predicted as a consequence of accelerated C sink saturation due to continued SOS  
53 advances and enhanced photosynthesis under rising CO<sub>2</sub> levels<sup>27</sup>. However, in the past, a  
54 sustained SOS advance<sup>3</sup> and a widely observed CO<sub>2</sub>-driven increase in photosynthesis<sup>30-33</sup> did  
55 not lead to a corresponding EOS advance<sup>3</sup>. With these interacting mechanisms operating over  
56 different spatio-temporal scales<sup>34</sup>, and the influence of their associated environmental controls,  
57 it has been challenging to identify general trends in the changes in autumn leaf senescence.

58 Here, we investigated this apparent conflict by decomposing long-term trends, interannual, and  
59 spatial variations using linear mixed-effects models (LMMs). We hypothesized that the  
60 relationships between  $A_{\text{net}}$  and EOS are driven by multiple processes and are non-stationary  
61 over decadal time scales. We complemented the analysis of multi-year ground observations  
62 (1948-2015) from the PEP725 dataset<sup>5</sup> of 434,226 European tree-level phenology observations  
63 with an analysis of remotely sensed phenological dates to expand the extent of data coverage  
64 in spatial and climatic space. Remotely sensed estimates of phenology (2001-2018) were  
65 obtained from MODIS MCD12Q2 Collection 6<sup>35, 36</sup> for 4,879 randomly sampled points of  
66 deciduous tree species in temperate and boreal forests in the northern hemisphere. We explored  
67 the robustness of  $A_{\text{net}}$  estimates and respective statistical models by using  $A_{\text{net}}$  estimates as  
68 previously used by Zani *et al.*<sup>27</sup> and performed all analyses also with estimates generated here  
69 using an alternative, comprehensively evaluated photosynthesis model<sup>37</sup>. See Methods for a  
70 detailed account of the analysis, data, and modelling.

71 We found opposing  $A_{\text{net}}$ -EOS relationships at different temporal scales. When controlling for  
72 the effect of  $A_{\text{net}}$ , we found a clear decadal-scale trend component towards later EOS ( $0.253 \pm$   
73  $0.001 \text{ d yr}^{-1}$ , Fig. 1A). After separating the long-term trend, the remaining  $A_{\text{net}}$ -EOS relationship  
74 reflects interannual variations (Fig. 1B). At this scale,  $A_{\text{net}}$  is negatively correlated with EOS,

75 as reported by Zani *et al.*<sup>27</sup> based on a univariate model (Fig. 1C). The net effect of these  
76 opposing relationships is a relatively small delay in EOS over time ( $0.046 \pm 0.001$  d yr<sup>-1</sup>, fig.  
77 S1A) - in spite of the steadily increasing (simulated)  $A_{\text{net}}$  since the mid-20<sup>th</sup> century (fig. S1B).  
78 These results are robust against the use of alternative  $A_{\text{net}}$  estimates<sup>37, 38</sup> in LMMs (figs. S1C,  
79 S2A and S2B). The parallel gradual  $A_{\text{net}}$  increase and long-term trend towards delayed autumn  
80 senescence indicate a positive  $A_{\text{net}}$ -EOS relationship - opposite to the negative relationship at  
81 the interannual time scale.

82 Scale-dependent relationship reversals were found also when decomposing interannual from  
83 spatial variations, i.e. when separating annual anomalies from multi-year means by site in  
84 LMMs. Due to relatively limited temporal coverage of the remote sensing data (2001-2018),  
85 we did not separate a long-term trend. Across space, higher mean  $A_{\text{net}}$  is associated with later  
86 mean EOS (Fig. 2A), while the opposite relationship prevails when considering interannual  
87 variations at a given location (Fig. 2B). The positive mean EOS-mean  $A_{\text{net}}$  relationship is also  
88 evident when considering the spatial distribution of observations across the Northern  
89 Hemisphere (Figs. 2C and 2D).

90 These relationships yield several insights into potential processes underlying phenology shifts  
91 under global environmental change. A link between interannual variations of  $A_{\text{net}}$  and EOS  
92 emerges from both the ground-based and remote sensing-based analyses. Since  $A_{\text{net}}$  represents  
93 the cumulative net CO<sub>2</sub> assimilation since SOS, the  $A_{\text{net}}$ -EOS relationship is closely related to  
94 the previously reported relationship between SOS and EOS<sup>17, 24-26</sup>. Early leaf unfolding leading  
95 to early senescence has been hypothesized to be the result of a relatively constant length of leaf  
96 phenological stages<sup>39</sup>, or of a leaf aging effect<sup>40-42</sup>, whereby a tightly constrained leaf longevity  
97 implies direct control of SOS on EOS<sup>24</sup>. Given the well-documented gradual SOS  
98 advancement<sup>43-47</sup> (fig. S1D), this process should induce an advancement also of EOS. Our  
99 analysis reveals that this has not been the case (figs. S3 and S4). Similarly, also the strong  
100 relationship between  $A_{\text{net}}$ -EOS, apparent at the interannual scale, has not been stationary over  
101 several decades. This indicates that the interplay between multiple drivers and processes has  
102 resulted in a gradual relief of tight constraints relevant at the interannual time scale, potentially  
103 arising from premature leaf aging or C sink saturation. We interpret this non-stationarity of the  
104  $A_{\text{net}}$ -EOS and the SOS-EOS relationships as being reflective of acclimation.

105 What are the drivers of observed phenological relationships and their acclimation? If the  
106 negative interannual  $A_{\text{net}}$ -EOS relationship was due to C sink saturation, it should prevail also  
107 in the long-term, as photosynthetic CO<sub>2</sub> assimilation is enhanced under rising atmospheric  
108 CO<sub>2</sub><sup>30-33</sup>. However, it appears that the tight constraints, apparent at the interannual scale, are  
109 relieved over the course of several decades. The opposing relationships at different scales found  
110 here question the prediction that gradual increases in photosynthesis cause a progressive  
111 advancement of EOS by earlier C sink saturation. Previous studies have generally demonstrated  
112 a thermal control delaying EOS across spatial gradients and years<sup>48</sup>. Rising autumn  
113 temperatures, causing a slow-down of chlorophyll degradation and leaf discoloration<sup>15</sup>, have  
114 been suggested to underlie trends and are considered in autumn senescence models<sup>49</sup>. Most  
115 warming experiments have also shown later EOS for various deciduous tree species<sup>50</sup>. Further  
116 insights into the importance of a potential C sink saturation mechanism causing a reversal of  
117 effects by warming autumn temperatures will be gained by linking observations of non-  
118 structural C dynamics with autumn phenology. Our results indicate that different mechanisms  
119 and environmental controls are at play at different temporal scales, potentially undermining  
120 long-term projections, informed by short-term observations of autumn phenology.

121 Why does a negative relationship between  $A_{\text{net}}$  and EOS emerge when the long-term trend and  
122 the spatial variation are not separated in LMMs? A possible explanation is that relatively large

123 interannual phenology variations dominate over the smaller long-term temporal pattern in the  
124 data we analysed, and mask their effect in univariate models. Indeed, separating the opposing  
125 long-term and spatial trends from the remaining component of interannual variations improves  
126 model performance significantly (ANOVA  $p < 0.001$  and lower AIC) and increases the strength  
127 of their interannual links in all models (see estimates for bivariate and univariate models in  
128 table S1). This provides further support for an important mechanism underlying the apparent  
129 link at the interannual scale. However, it also indicates that this does not preclude the existence  
130 of other mechanisms, enabling an acclimating response, and leading to a relief of phenology  
131 relationships apparent at the interannual scale and to a sustained delay of EOS. The net effect  
132 of opposing mechanisms, apparent in the univariate models, is subject to the data and their  
133 relative magnitudes of variations across multiple scales.

134 The long-term and spatial relationships between  $A_{\text{net}}$  and EOS (and between SOS and EOS) are  
135 qualitatively consistent. This indicates that the phenology of individual trees has acclimated  
136 over the course of decades in the same direction as evident from the spatial analysis (high  $A_{\text{net}}$   
137 occurs in places with late EOS, Figs. 2C and D). Note that the long-term temporal trends  
138 derived from tree-level observations in the PEP data emerge within individual species observed  
139 at different locations, while spatial variations may arise also as a result of varying species  
140 composition across space and of adaptation within populations of a given species. Our results  
141 suggest a clear plasticity of autumn phenology over time, mirroring effects by species  
142 distribution and long-term adaptation of individuals and plant communities growing along a  
143 large climatic gradient. This indicates a trend towards optimal, climate-adapted functioning.

144 Opposing relationships at different time scales and across the Northern Hemisphere reconcile  
145 apparent conflicts by the reported negative  $A_{\text{net}}$ -EOS relationship but absent shifts towards  
146 earlier EOS as  $A_{\text{net}}$  has increased over past decades. We conclude that a gradual acclimation of  
147 plant physiology and adaptation of phenology has enabled plants to transcend a constrained  
148 leaf longevity or a stationary C sink saturation effect, evident from the clear short-term SOS-  
149 EOS and  $A_{\text{net}}$ -EOS relationships. Thus, in the long run, plants may assimilate more  $\text{CO}_2$  without  
150 a direct and inescapable penalty by earlier leaf senescence and without thus foregoing late-  
151 season carbon assimilation. This apparent plasticity in phenology appears to have driven plants  
152 towards optimal functioning in a changing climate.

## 153 **Methods**

### 154 Pan European observational data

155 Spring and autumn phenology dates were collected from the Pan European Phenology Project<sup>5</sup>,  
156 which provides in-situ observations for Europe. Phenology dates were defined following the  
157 BBCH (Biologische Bundesanstalt, Bundessortenamt und Chemische Industrie) codes and the  
158 data selection made by *Zani et al.*<sup>27</sup>. Leaf-out was defined as the date when the first (BBCH11)  
159 or 50% of leaf stalks are visible (BBCH13) for the deciduous angiosperms, and as the date  
160 when the first leaves separated (BBCH10) for the deciduous conifers. Leaf senescence was  
161 defined as the date when 50% of leaves had lost their green color (BBCH94) or had fallen  
162 (BBCH95). Following *Zani et al.*<sup>27</sup> data cleaning, the dataset resulted in 3,855 sites across  
163 Central Europe with 14,626 individual time series and 434,226 phenological observations  
164 between 1948 and 2015.

### 165 MODIS phenology data

166 We used the MODIS C6 MCD12Q2 Land Surface Dynamics Product<sup>35</sup> which provides land  
167 surface phenological data at 500-meter spatial resolution from 2001 to 2018, derived from time  
168 series of the 2-band Enhanced Vegetation Index (EVI2) calculated from MODIS Nadir Bi-  
169 directional Reflectance Distribution Function (BRDF) adjusted surface reflectance (NBAR-  
170 EVI2)<sup>36, 51</sup>. From this product, leaf-out (start-of-season, SOS) was taken as the MidGreenup  
171 point, i.e., the date when EVI2 first crossed 50% of the segment EVI2 amplitude. Leaf  
172 senescence (end-of-season, EOS) was taken as the MidGreendown point, i.e., the date when  
173 EVI2 last crossed 50% of the segment EVI2 amplitude. We selected the MidGreenup and  
174 MidGreendown to define SOS and EOS instead of the Greenup and Dormancy following the  
175 advice from the MCD12Q2 Product user guide to capture the season start and end in high-  
176 latitude regions. Data were downloaded using the *MODISTools* R package<sup>52</sup>. We randomly  
177 sampled 5,000 pixels spread evenly between temperate deciduous needle and broadleaf IGBP  
178 classes and selected the points corresponding to the Northern Hemisphere (4,879).

### 179 Photosynthesis estimation

180 For locations where tree-level phenology observations were available from the PEP data, we  
181 used two alternative estimates of  $A_{net}$ . Results shown in Fig. 1 are based on  $A_{net}$  as estimated by  
182 *Zani et al.*<sup>27</sup> using their implementation of the LPJ model<sup>38</sup> and represents gross assimilation  
183 minus daytime dark respiration. The cumulative growing season net photosynthesis ( $A_{net}$ ) was  
184 then obtained by summing the daily  $A_{net}$  for all days of the growing season, starting at the date  
185 of observed SOS as given by the PEP data and ending on the date when daylength falls below  
186 11.2 hours. A detailed explanation of the seasonal photosynthesis estimation is provided in  
187 *Zani et al.*<sup>27</sup>. Results shown in figs. S1C and S2 are based on estimates of  $A_{net}$  using the P-  
188 model<sup>37</sup> as implemented by the *rsofun* R package<sup>53</sup>, and represent gross assimilation minus  
189 dark respiration. Cumulative  $A_{net}$  was calculated from days starting at the observed SOS and  
190 ending at the summer solstice (21<sup>st</sup> of June in the Northern Hemisphere). The same P-model  
191 based approach was applied for estimating cumulative  $A_{net}$  at locations where phenology data  
192 was extracted from the MODIS remote sensing product. The P-model predicts leaf-level  
193 acclimation of photosynthesis to its environment and simulates CO<sub>2</sub> assimilation as a linear  
194 function of absorbed photosynthetically active radiation (APAR). Here, APAR is based on  
195 shortwave radiation from WATCH-WFDEI<sup>54</sup> and downscaled using WorldClim2<sup>55</sup>, assuming  
196 a fraction of APAR of 1.0 for all sites and dates between their respectively observed SOS and  
197 EOS dates. Hence,  $A_{net}$  represents a leaf-level quantity, representative for conditions in full  
198 light. Also other meteorological forcing data for P-model simulations were taken from  
199 WATCH-WFDEI<sup>54</sup>, downscaled using WorldClim2<sup>55</sup> as implemented by the *ingestr* R  
200 package<sup>56</sup>. Details of the theory underlying the P-model are described in *Stocker et al.*<sup>37</sup>) and  
201 *Wang et al.*<sup>57</sup>.

## 202 Data analysis

203 We fitted linear mixed-effects models to investigate the relationships between autumn  
204 phenology (EOS), net photosynthesis ( $A_{\text{net}}$ ) and spring leaf-out (SOS). We were particularly  
205 interested in separating the interannual, the long-term, and the spatial components of variation.  
206 The general structure of the models can be summarized as:

$$207 \quad Y = Xa + Zb + \varepsilon_t$$

208

209 where  $Y$  represents the dependent variable (i.e., EOS, expressed as day-of-year),  $a$  is the vector  
210 of fixed effects,  $b$  is the vector of random intercepts,  $X$  and  $Z$  are regression matrices of fixed  
211 and random effects, respectively, and  $\varepsilon_t$  is the within-group error vector. For performing the  
212 temporal analyses, the predictor variables ( $A_{\text{net}}$ , SOS, year) were standardized and site and  
213 species were treated as grouping variables of random intercepts. For performing the spatial  
214 analysis, we calculated the mean and standard deviation values of the predictors ( $A_{\text{net}}$  and SOS)  
215 and evaluated their effects on EOS. Site and year were treated as grouping variables of random  
216 intercepts for spatial analyses with MODIS data. Residuals of the models were checked for  
217 normality and homoscedasticity. Linear mixed-effects models were fitted using the *lme4* R  
218 package<sup>58</sup>. The analyses were performed using the R statistical software version 4.0.5<sup>59</sup>.

## 219 **Acknowledgments**

220 We thank Trevor Keenan and Yann Vitasse for helpful comments on the manuscript. LM and  
221 BDS were funded by the Swiss National Science Foundation grant no. PCEFP2\_181115. KH  
222 was supported by the generosity of Eric and Wendy Schmidt by recommendation of the  
223 Schmidt Futures program. CMZ was funded by the Ambizione grant PZ00P3\_193646. Data  
224 were provided by the members of the PEP725 project.

## 225 **Author contributions**

226 BDS and LM conceived and developed the study; CMZ gathered the PEP data and ran the LPJ  
227 simulations; BDS, KH and LM gathered the MODIS data, ran the P-model simulations, and  
228 conducted the statistical analyses; LM and BDS led the writing of the manuscript; CB  
229 contributed critically to the analyses and the writing; CMZ and TC gave substantial inputs to  
230 the manuscript. All authors gave final approval for publication.

## 231 **Competing interests**

232 The authors declare no competing interests.

## 233 **Data and materials availability**

234 Code for the data analysis of this study is available at the Github repository  
235 DOI:10.5281/zenodo.5799643. Ground phenology data provided by the members of the  
236 PEP725 project is freely available at <http://www.pep725.eu>. Remote-sensing phenology data  
237 from the MODIS C6 MCD12Q2 Land Surface Dynamics Product is freely accessible at  
238 <https://lpdaac.usgs.gov/products/mcd12q2v006/>.

## 239 References

- 240 1. M. Peaucelle, I. A. Janssens, B. D. Stocker, A. Descals Ferrando, Y. H. Fu, R.  
241 Molowny-Horas, P. Ciais, J. Peñuelas, Spatial variance of spring phenology in  
242 temperate deciduous forests is constrained by background climatic conditions. *Nat.*  
243 *Commun.* 10, 5388 (2019).
- 244 2. A. D. Hopkins, The Bioclimatic Law. *Monthly Weather Review.* 48, 355–355 (1920).
- 245 3. S. Piao, Q. Liu, A. Chen, I. A. Janssens, Y. Fu, J. Dai, L. Liu, X. Lian, M. Shen, X.  
246 Zhu, Plant phenology and global climate change: Current progresses and challenges.  
247 *Glob. Chang. Biol.* 25, 1922–1940 (2019).
- 248 4. Q. Ge, H. Wang, T. Rutishauser, J. Dai, Phenological response to climate change in  
249 China: a meta-analysis. *Glob. Chang. Biol.* 21, 265–274 (2015).
- 250 5. B. Templ, E. Koch, K. Bolmgren, M. Ungersböck, A. Paul, H. Scheifinger, T.  
251 Rutishauser, M. Busto, F.-M. Chmielewski, L. Hájková, S. Hodzić, F. Kaspar, B.  
252 Pietragalla, R. Romero-Fresneda, A. Tolvanen, V. Vučetič, K. Zimmermann, A. Zust,  
253 Pan European Phenological database (PEP725): a single point of access for European  
254 data. *Int. J. Biometeorol.* 62, 1109–1113 (2018).
- 255 6. A. D. Richardson, T. F. Keenan, M. Migliavacca, Y. Ryu, O. Sonnentag, M. Toomey,  
256 Climate change, phenology, and phenological control of vegetation feedbacks to the  
257 climate system. *Agric. For. Meteorol.* 169, 156–173 (2013).
- 258 7. J. T. Morisette, A. D. Richardson, A. K. Knapp, J. I. Fisher, E. A. Graham, J.  
259 Abatzoglou, B. E. Wilson, D. D. Breshears, G. M. Henebry, J. M. Hanes, L. Liang,  
260 Tracking the rhythm of the seasons in the face of global change: phenological research  
261 in the 21st century. *Front. Ecol. Environ.* 7, 253–260 (2009).
- 262 8. D. F. B. Flynn, E. M. Wolkovich, Temperature and photoperiod drive spring phenology  
263 across all species in a temperate forest community. *New Phytol.* 219, 1353–1362  
264 (2018).
- 265 9. J. Peñuelas, T. Rutishauser, I. Filella, Ecology. Phenology feedbacks on climate  
266 change. *Science.* 324, 887–888 (2009).
- 267 10. C. Körner, D. Basler, Plant science. Phenology under global warming. *Science.* 327,  
268 1461–1462 (2010).
- 269 11. N. Delpierre, Y. Vitasse, I. Chuine, J. Guillemot, S. Bazot, T. Rutishauser, C. B. K.  
270 Rathgeber, Temperate and boreal forest tree phenology: from organ-scale processes to  
271 terrestrial ecosystem models. *Annals of Forest Science.* 73, 5–25 (2016).
- 272 12. S. T. Klosterman, K. Hufkens, J. M. Gray, E. Melaas, O. Sonnentag, I. Lavigne, L.  
273 Mitchell, R. Norman, M. A. Friedl, A. D. Richardson, Evaluating remote sensing of  
274 deciduous forest phenology at multiple spatial scales using PhenoCam imagery.  
275 *Biogeosciences.* 11, 4305–4320 (2014).
- 276 13. K. Hufkens, M. Friedl, O. Sonnentag, B. H. Braswell, T. Milliman, A. D. Richardson,  
277 Linking near-surface and satellite remote sensing measurements of deciduous broadleaf  
278 forest phenology. *Remote Sens. Environ.* 117, 307–321 (2012).
- 279 14. S. R. Garrity, G. Bohrer, K. D. Maurer, K. L. Mueller, C. S. Vogel, P. S. Curtis, A  
280 comparison of multiple phenology data sources for estimating seasonal transitions in  
281 deciduous forest carbon exchange. *Agric. For. Meteorol.* 151, 1741–1752 (2011).

- 282 15. Y. Fracheboud, V. Luquez, L. Björkén, A. Sjödin, H. Tuominen, S. Jansson, The  
283 control of autumn senescence in European aspen. *Plant Physiol.* 149, 1982–1991  
284 (2009).
- 285 16. B. Mariën, I. Dox, H. J. De Boeck, P. Willems, S. Leys, D. Papadimitriou, M. Campioli,  
286 Does drought advance the onset of autumn leaf senescence in temperate deciduous  
287 forest trees? *Biogeosciences.* 18, 3309–3330 (2021).
- 288 17. Y. H. Fu, S. Piao, N. Delpierre, F. Hao, H. Hänninen, Y. Liu, W. Sun, I. A. Janssens,  
289 M. Campioli, Larger temperature response of autumn leaf senescence than spring leaf-  
290 out phenology. *Glob. Chang. Biol.* 24, 2159–2168 (2018).
- 291 18. A. Menzel, T. H. Sparks, N. Estrella, D. B. Roy, Altered geographic and temporal  
292 variability in phenology in response to climate change. *Glob. Ecol. Biogeogr.* 15, 498–  
293 504 (2006).
- 294 19. O. Gordo, J. J. Sanz, Long-term temporal changes of plant phenology in the Western  
295 Mediterranean. *Glob. Chang. Biol.* 15, 1930–1948 (2009).
- 296 20. A. Menzel, P. Fabian, Growing season extended in Europe. *Nature.* 397, 659–659  
297 (1999).
- 298 21. D. Basler, Evaluating phenological models for the prediction of leaf-out dates in six  
299 temperate tree species across central Europe. *Agric. For. Meteorol.* 217, 10–21 (2016).
- 300 22. T. F. Keenan, I. Baker, A. Barr, P. Ciais, K. Davis, M. Dietze, D. Dragoni, C. M. Gough,  
301 R. Grant, D. Hollinger, K. Hufkens, B. Poulter, H. McCaughey, B. Raczka, Y. Ryu, K.  
302 Schaefer, H. Tian, H. Verbeeck, M. Zhao, A. D. Richardson, Terrestrial biosphere  
303 model performance for inter-annual variability of land-atmosphere CO<sub>2</sub> exchange.  
304 *Glob. Chang. Biol.* 18, 1971–1987 (2012).
- 305 23. G. Liu, X. Chen, Y. Fu, N. Delpierre, Modelling leaf coloration dates over temperate  
306 China by considering effects of leafy season climate. *Ecol. Modell.* 394, 34–43 (2019).
- 307 24. T. F. Keenan, A. D. Richardson, The timing of autumn senescence is affected by the  
308 timing of spring phenology: implications for predictive models. *Glob. Chang. Biol.* 21,  
309 2634–2641 (2015).
- 310 25. C. Wu, X. Hou, D. Peng, A. Gonsamo, S. Xu, Land surface phenology of China’s  
311 temperate ecosystems over 1999–2013: Spatial-temporal patterns, interaction effects,  
312 covariation with climate and implications for productivity. *Agric. For. Meteorol.* 216,  
313 177–187 (2016).
- 314 26. Y. S. H. Fu, M. Campioli, Y. Vitasse, H. J. De Boeck, J. Van den Berge, H.  
315 AbdElgawad, H. Asard, S. Piao, G. Deckmyn, I. A. Janssens, Variation in leaf flushing  
316 date influences autumnal senescence and next year’s flushing date in two temperate tree  
317 species. *Proc. Natl. Acad. Sci. U. S. A.* 111, 7355–7360 (2014).
- 318 27. D. Zani, T. W. Crowther, L. Mo, S. S. Renner, C. M. Zohner, Increased growing-season  
319 productivity drives earlier autumn leaf senescence in temperate trees. *Science.* 370,  
320 1066–1071 (2020).
- 321 28. M. J. Paul, C. H. Foyer, Sink regulation of photosynthesis. *J. Exp. Bot.* 52, 1383–1400  
322 (2001).
- 323 29. A. Herold, Regulation of photosynthesis by sink activity-the missing link. *New*  
324 *Phytologist.* 86, 131–144 (1980).



- 325 30. T. F. Keenan, I. Colin Prentice, J. G. Canadell, C. A. Williams, H. Wang, M. Raupach,  
326 G. James Collatz, Recent pause in the growth rate of atmospheric CO<sub>2</sub> due to enhanced  
327 terrestrial carbon uptake. *Nat. Commun.* 7 (2016).
- 328 31. J. E. Campbell, J. A. Berry, U. Seibt, S. J. Smith, S. A. Montzka, T. Launois, S. Belviso,  
329 L. Bopp, M. Laine, Large historical growth in global terrestrial gross primary  
330 production. *Nature*. 544, 84–87 (2017).
- 331 32. D. Schimel, B. B. Stephens, J. B. Fisher, Effect of increasing CO<sub>2</sub> on the terrestrial  
332 carbon cycle. *Proc. Natl. Acad. Sci. U. S. A.* 112, 436–441 (2015).
- 333 33. A. P. Walker, M. G. De Kauwe, A. Bastos, S. Belmecheri, K. Georgiou, R. F. Keeling,  
334 S. M. McMahon, B. E. Medlyn, D. J. P. Moore, R. J. Norby, S. Zaehle, K. J. Anderson-  
335 Teixeira, G. Battipaglia, R. J. W. Brienen, K. G. Cabugao, M. Cailleret, E. Campbell,  
336 J. G. Canadell, P. Ciais, M. E. Craig, D. S. Ellsworth, G. D. Farquhar, S. Fatichi, J. B.  
337 Fisher, D. C. Frank, H. Graven, L. Gu, V. Haverd, K. Heilman, M. Heimann, B. A.  
338 Hungate, C. M. Iversen, F. Joos, M. Jiang, T. F. Keenan, J. Knauer, C. Körner, V. O.  
339 Leshyk, S. Leuzinger, Y. Liu, N. MacBean, Y. Malhi, T. R. McVicar, J. Penuelas, J.  
340 Pongratz, A. S. Powell, T. Riutta, M. E. B. Sabot, J. Schleucher, S. Sitch, W. K. Smith,  
341 B. Sulman, B. Taylor, C. Terrer, M. S. Torn, K. K. Treseder, A. T. Trugman, S. E.  
342 Trumbore, P. J. van Mantgem, S. L. Voelker, M. E. Whelan, P. A. Zuidema, Integrating  
343 the evidence for a terrestrial carbon sink caused by increasing atmospheric CO. *New*  
344 *Phytol.* 229, 2413–2445 (2021).
- 345 34. Q. Liu, S. Piao, M. Campioli, M. Gao, Y. H. Fu, K. Wang, Y. He, X. Li, I. A. Janssens,  
346 Modeling leaf senescence of deciduous tree species in Europe. *Glob. Chang. Biol.* 26,  
347 4104–4118 (2020).
- 348 35. M. Friedl, J. Gray, D. Sulla-Menashe, MCD12Q2 MODIS/Terra+Aqua Land Cover  
349 Dynamics Yearly L3 Global 500m SIN Grid V006 (2019).
- 350 36. X. Zhang, M. A. Friedl, C. B. Schaaf, A. H. Strahler, J. C. F. Hodges, F. Gao, B. C.  
351 Reed, A. Huete, Monitoring vegetation phenology using MODIS. *Remote Sens.*  
352 *Environ.* 84, 471–475 (2003).
- 353 37. B. D. Stocker, H. Wang, N. G. Smith, S. P. Harrison, T. F. Keenan, D. Sandoval, T.  
354 Davis, I. C. Prentice, P-model v1.0: an optimality-based light use efficiency model for  
355 simulating ecosystem gross primary production. *Geosci. Model Dev.* 13, 1545–1581  
356 (2020).
- 357 38. S. Sitch, B. Smith, I. C. Prentice, A. Arneth, A. Bondeau, W. Cramer, J. O. Kaplan, S.  
358 Levis, W. Lucht, M. T. Sykes, K. Thonicke, S. Venevsky, Evaluation of ecosystem  
359 dynamics, plant geography and terrestrial carbon cycling in the LPJ dynamic global  
360 vegetation model. *Glob. Chang. Biol.* 9, 161–185 (2003).
- 361 39. H. Hänninen, K. Tanino, Tree seasonality in a warming climate. *Trends Plant Sci.* 16,  
362 412–416 (2011).
- 363 40. K. Kikuzawa, M. J. Lechowicz, Ecology of Leaf Longevity. *Ecological Research*  
364 *Monographs* (2011).
- 365 41. Y. H. Fu, S. Piao, N. Delpierre, F. Hao, H. Hänninen, X. Geng, J. Peñuelas, X. Zhang,  
366 I. A. Janssens, M. Campioli, Nutrient availability alters the correlation between spring  
367 leaf-out and autumn leaf senescence dates. *Tree Physiol.* 39, 1277–1284 (2019).
- 368 42. P. O. Lim, H. J. Kim, H. G. Nam, Leaf senescence. *Annu. Rev. Plant Biol.* 58, 115–136  
369 (2007).

- 370 43. S. Piao, P. Friedlingstein, P. Ciais, N. Viovy, J. Demarty, Growing season extension  
371 and its impact on terrestrial carbon cycle in the Northern Hemisphere over the past 2  
372 decades. *Global Biogeochem. Cycles*. 21 (2007).
- 373 44. S.-J. Jeong, C.-H. Ho, H.-J. Gim, M. E. Brown, Phenology shifts at start vs. end of  
374 growing season in temperate vegetation over the Northern Hemisphere for the period  
375 1982-2008. *Glob. Chang. Biol.* 17, 2385–2399 (2011).
- 376 45. N. Cong, T. Wang, H. Nan, Y. Ma, X. Wang, R. B. Myneni, S. Piao, Changes in  
377 satellite-derived spring vegetation green-up date and its linkage to climate in China  
378 from 1982 to 2010: a multimethod analysis. *Glob. Chang. Biol.* 19, 881–891 (2013).
- 379 46. T. F. Keenan, J. Gray, M. A. Friedl, M. Toomey, G. Bohrer, D. Y. Hollinger, J. W.  
380 Munger, J. O’Keefe, H. P. Schmid, I. S. Wing, B. Yang, A. D. Richardson, Net carbon  
381 uptake has increased through warming-induced changes in temperate forest phenology.  
382 *Nat. Clim. Chang.* 4, 598–604 (2014).
- 383 47. I. Garonna, R. de Jong, M. E. Schaepman, Variability and evolution of global land  
384 surface phenology over the past three decades (1982-2012). *Glob. Chang. Biol.* 22,  
385 1456–1468 (2016).
- 386 48. M. Estiarte, J. Peñuelas, Alteration of the phenology of leaf senescence and fall in  
387 winter deciduous species by climate change: effects on nutrient proficiency. *Glob.*  
388 *Chang. Biol.* 21, 1005–1017 (2015).
- 389 49. N. Delpierre, E. Dufrêne, K. Soudani, E. Ulrich, S. Cecchini, J. Boé, C. François,  
390 Modelling interannual and spatial variability of leaf senescence for three deciduous tree  
391 species in France. *Agric. For. Meteorol.* 149, 938–948 (2009).
- 392 50. H. Chung, H. Muraoka, M. Nakamura, S. Han, O. Muller, Y. Son, Experimental  
393 warming studies on tree species and forest ecosystems: a literature review. *J. Plant Res.*  
394 126, 447–460 (2013).
- 395 51. C. B. Schaaf, F. Gao, A. H. Strahler, W. Lucht, X. Li, T. Tsang, N. C. Strugnell, X.  
396 Zhang, Y. Jin, J.-P. Muller, P. Lewis, M. Barnsley, P. Hobson, M. Disney, G. Roberts,  
397 M. Dunderdale, C. Doll, R. P. d’Entremont, B. Hu, S. Liang, J. L. Privette, D. Roy,  
398 First operational BRDF, albedo nadir reflectance products from MODIS. *Remote Sens.*  
399 *Environ.* 83, 135–148 (2002).
- 400 52. S. L. Tuck, H. R. Phillips, R. E. Hintzen, J. P. Scharlemann, A. Purvis, L. N. Hudson,  
401 *MODISTools* - downloading and processing MODIS remotely sensed data in R. *Ecol.*  
402 *Evol.* 4, 4658–4668 (2014).
- 403 53. B. Stocker, *rsofun* (Zenodo, 2020; <https://zenodo.org/record/3632328>).
- 404 54. G. P. Weedon, G. Balsamo, N. Bellouin, S. Gomes, M. J. Best, P. Viterbo, The WFDEI  
405 meteorological forcing data set: WATCH Forcing Data methodology applied to ERA-  
406 Interim reanalysis data. *Water Resour. Res.* 50, 7505–7514 (2014).
- 407 55. S. E. Fick, R. J. Hijmans, WorldClim 2: new 1-km spatial resolution climate surfaces  
408 for global land areas. *International Journal of Climatology*. 37, 4302–4315 (2017).
- 409 56. B. Stocker, *ingest* (Zenodo, 2020; <https://zenodo.org/record/4392703>).
- 410 57. H. Wang, I. C. Prentice, T. F. Keenan, T. W. Davis, I. J. Wright, W. K. Cornwell, B. J.  
411 Evans, C. Peng, Towards a universal model for carbon dioxide uptake by plants. *Nat*  
412 *Plants*. 3, 734–741 (2017).

- 413 58. D. Bates, M. Mächler, B. Bolker, S. Walker, Fitting linear mixed-effects models Using  
414 *lme4*. *J. Stat. Softw.* 67 (2015).
- 415 59. R Core Team (2021). R: A language and environment for statistical computing. R  
416 Foundation for Statistical Computing, Vienna, Austria.

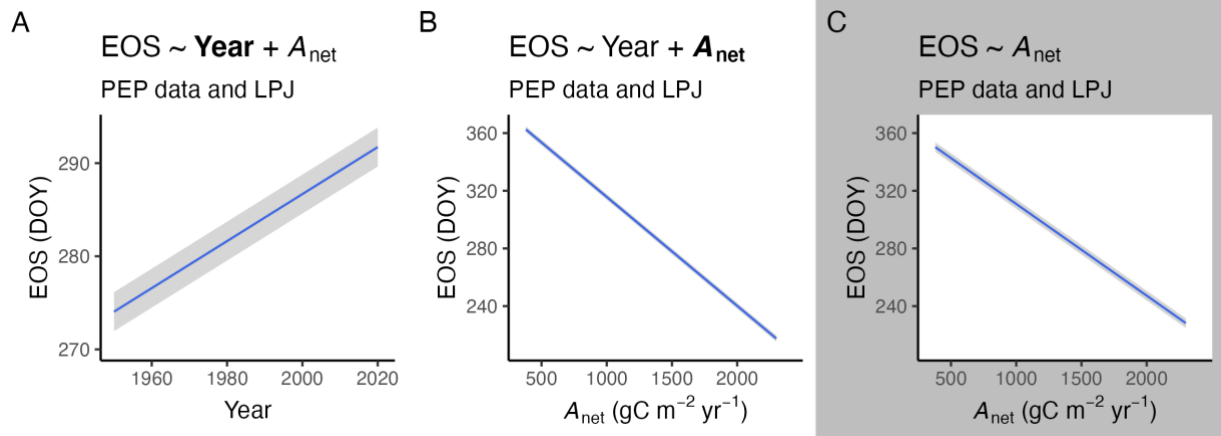

417

418 **Fig. 1. Relationship of CO<sub>2</sub> assimilation and autumn phenology from local observations**  
419 **(PEP725 data).** (A, B) Partial relationships of a multiple LMM, where end-of-season (EOS,  
420 expressed as day-of-year, DOY) is the response variable and (A) the long-term trend (year) and  
421 (B)  $A_{net}$  (simulated using the LPJ model) are treated as fixed effects. (C) EOS versus  $A_{net}$  based  
422 on an LMM with  $A_{net}$  as a single fixed effect. Blue lines represent the expected values from  
423 LMMs and grey ranges their 95% confidence intervals. In both bivariate and univariate models,  
424 site and species are treated as grouping variables of random intercepts.

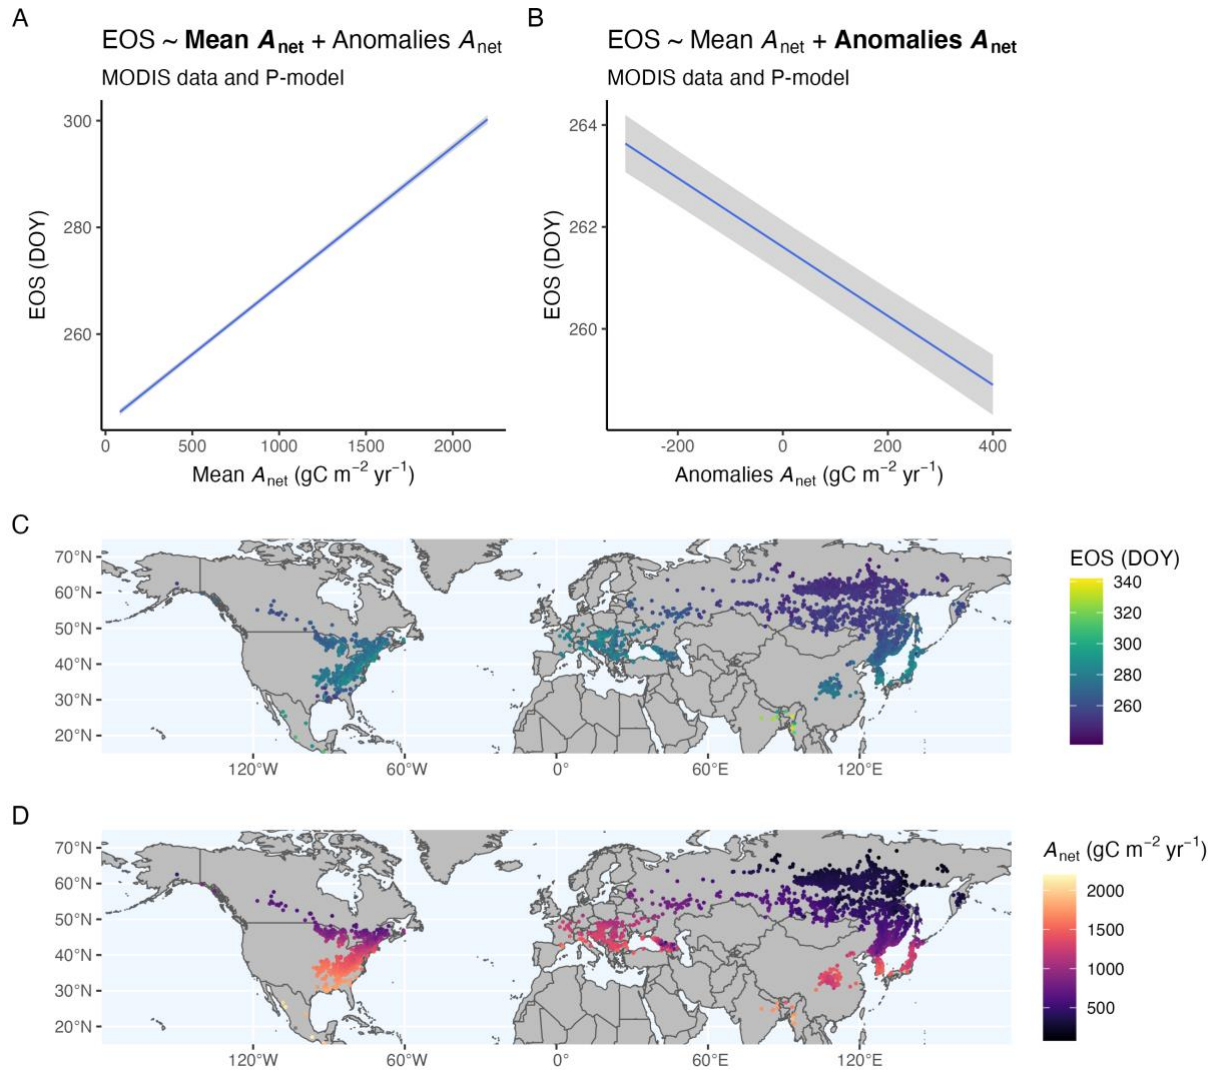

425

426 **Fig. 2. Relationships of CO<sub>2</sub> assimilation and autumn phenology from remote-sensing**  
427 **observations (MODIS C6 MCD12Q2 data).** (A, B) Partial relationships of a multiple LMM,  
428 with  $A_{net}$  simulated using the P-model, and where both (A)  $A_{net}$  mean and (B) anomalies relative  
429 to the mean value from 2001 to 2018 are treated as fixed effects, and site and year are treated  
430 as grouping variables of random intercepts. Blue lines represent the expected values from  
431 LMMs and grey ranges their 95% confidence intervals. (C, D) Mean values of (C) EOS and  
432 (D)  $A_{net}$  simulated by the P-model for grid cells distributed along the Northern Hemisphere.
